# Supplementary material for: Two new coordination polymers with multiform helical features based on flexible dithioether ligands and CuCN: from self-penetrating to 3-fold interpenetrating structures
Source: Royal Society of Chemistry journal article supplement (doi:10.1039/c0ce00167h), 2010-01-01
Supplement: c0ce00167h.pdf [file c0ce00167h.pdf]

## *Supporting Information*

Two new coordination polymers with multiform helical features based on flexible dithioether ligands and CuCN: from self-penetrating to 3-fold interpenetrating structures

Lei Hou, Wen-Juan Shi, Yao-Yu Wang,\* Bo Liu, Wen-Huan Huang, Qi-Zhen Shi

Key Laboratory of Synthetic and Natural Functional Molecule Chemistry of the Ministry of Education, Shanxi Key Laboratory of Physico-Inorganic Chemistry, College of Chemistry & Materials Science, Northwest University, Xi'an 710069, P. R. China. Tel: (86)-20-88303097.

E-mail: [wyaoyu@nwu.edu.cn](mailto:wyaoyu@nwu.edu.cn) (Y.-Y. W.).

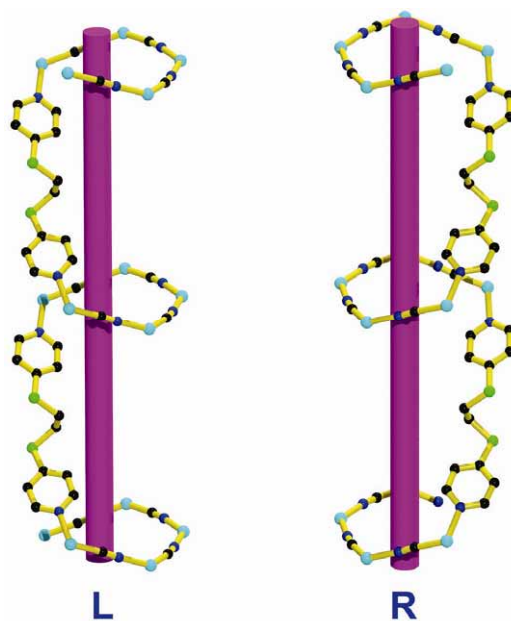

**Fig. S1** The left- and right-handed helical channels formed by L2 and CuCN fragments in complex **2**, respectively.

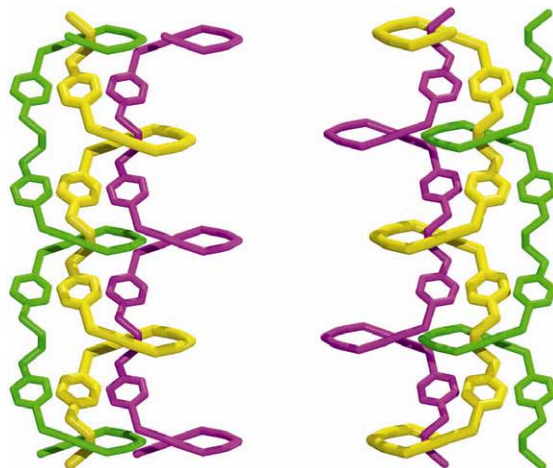

**Fig. S2** Entangled subunits formed by entangled double left-helical (a) or right-helical (b) chains in complex **2**, respectively.

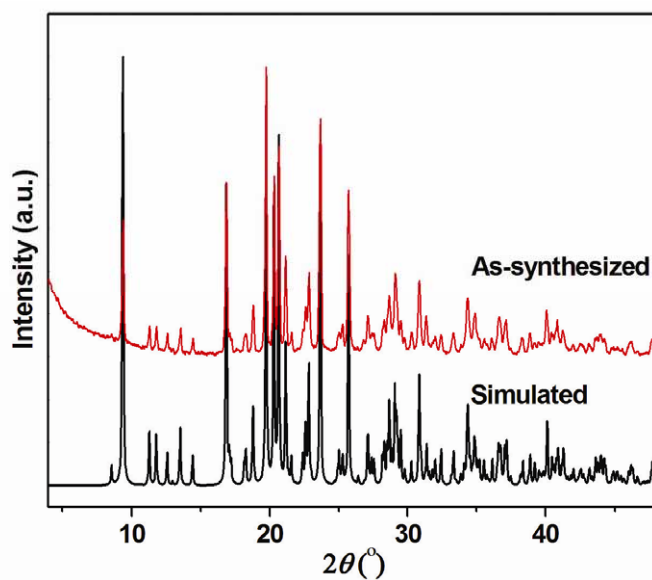

**Fig. S3** PXR D patterns of complex **1** simulated from the X-ray single-crystal structure and as-synthesized samples of complex **1**.

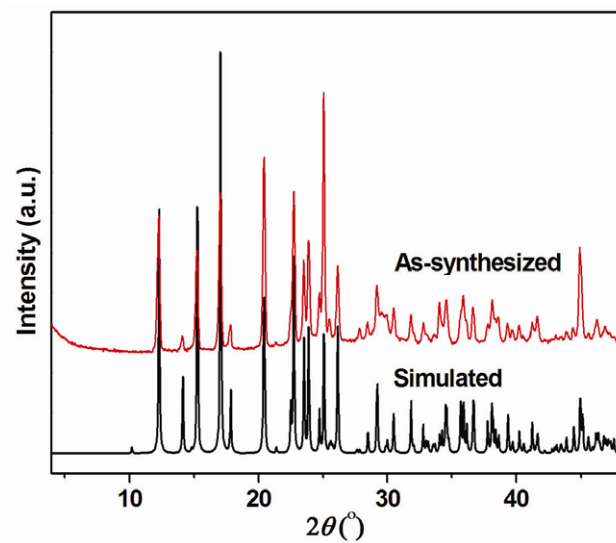

**Fig. S4** PXR D patterns of complex **2** simulated from the X-ray single-crystal structure and as-synthesized samples of complex **2**.
